# Supplementary material
Source: HighWire-hosted journal article supplement (https://www.ghspjournal.org/highwire/filestream/1571/field_highwire_adjunct_files/1/GHSP-D-14-00067-Landegger-Supplementary-Table-2.docx)
Supplement: GHSP-D-14-00067-Landegger-Supplementary-Table-2.docx [file GHSP-D-14-00067-Landegger-Supplementary-Table-2.docx]

**Supplementary Table 2:** Basic district characteristics included in regression* and the percent of the population living in rural areas

| **District** | **Date of first CHW training** | **Endemic malaria** | **Kabeho Mwana Project** | **Percent rural**  **(DHS 2010)** |
| --- | --- | --- | --- | --- |
| Bugasera | Sep 2009 | yes | no | 100% |
| Burera | May 2009 | no | no | 100% |
| Gakenke | Oct 2009 | no | no | 100% |
| Gasabo | Jan 2011 | yes | no | 48% |
| Gatsibo | May 2010 | yes | no | 100% |
| Gicumbi | Aug 2010 | no | no | 89% |
| **Gisagara** | **Nov 2008** | **yes** | **yes** | 100% |
| Huye | Oct 2010 | yes | no | 81% |
| Kamonyi | Dec 2010 | yes | no | 100% |
| Karongi | Jul 2010 | no | no | 87% |
| Kayonza | Sep 2010 | yes | no | 100% |
| Kicukiro | Jan 2010 | yes | no | 0% |
| **Kirehe** | **Jun 2008** | **yes** | **yes** | 100% |
| Muhanga | Oct 2010 | no | no | 79% |
| Musanze | May 2009 | no | no | 91% |
| **Ngoma** | **Feb 2009** | **yes** | **yes** | 88% |
| Ngororero | May 2009 | no | no | 100% |
| Nyabihu | May 2009 | no | no | 100% |
| Nyagatare | Oct 2010 | yes | no | 100% |
| **Nyamagabe** | **Feb 2009** | **no** | **yes** | 94% |
| **Nyamasheke** | **Feb 2009** | **yes** | **yes** | 100% |
| Nyanza | Mar 2009 | yes | no | 79% |
| Nyarugenge | Jan 2011 | yes | no | 6% |
| **Nyaruguru** | **Feb 2009** | **no** | **yes** | 100% |
| Rubavu | May 2009 | no | no | 91% |
| Ruhango | Nov 2008 | yes | no | 85% |
| Rulindo | Oct 2010 | yes | no | 100% |
| Rusizi | Oct 2009 | yes | no | 91% |
| Rutsiro | Jun 2010 | no | no | 100% |
| Rwamagana | Oct 2010 | yes | no | 87% |

*The regression also included the district as a fixed effect.
